# Supplementary material
Source: publisher figshare collection journal article supplement (https://gsajournals.figshare.com/ndownloader/files/31271191)
Supplement: Supplementary file 1 [file 31271191]

## Sheet: Sheet1
	Supplementary Table S2. Information for RMCE and other plasmids used in this study
	S2A. RMCE plasmids
	Plasmid	Injection concentration	Plasmid co-injection marker (concentration)	Description	Notes
	pBRC_double_attB_GFP_donor	100 ng/μl	myo-2p::mCherry (8 ng/μl)	attB-phiC31-f; sur-5p::GFP; Cbr-unc-119; attR2R1-Gateway; attB-phiC31-r	Can clone into the Gateway R1R2 site; sur-5p::GFP can be used to follow integrant; available from Addgene (ID#169692)
	pCG150_double_phiC31_attB	100 ng/μl	egl-20p::mCherry (25 ng/μl)	attB-phiC31-f; attR4R3-Gateway; Cel-unc-119; attB-phiC31-r	Can clone into the Gateway R3R4 site; no fluorescent marker; available from Addgene (ID#169693)
	pBRC_double_attB_GFP	100 ng/μl	myo-3p::mCherry (8 ng/μl)	attB-phiC31-f; sur-5p::GFP; attB-phiC31-r
	pBRC_double_attB_GFP_mCherry	100 ng/μl	myo-3p::mCherry (8 ng/μl)	attB-phiC31-f; sur-5p::GFP; Cbr-unc-119; myo-2p::mCherry; attB-phiC31-r	Obtained by cloning myo-2p::mCherry into the Gateway R2R1 site in pBRC_double_attB_GFP_donor
	pDonor_double_phiC31_attB_SCMp::GFP(PEST)::H2B::lin-41_3'UTR::SL2::mCherry::H2B::unc-54_3'UTR	100 ng/μl	egl-20p::mCherry (25 ng/μl)	Same as plasmid name; reporter construct was cloned into pCG150_double_phiC31_attB before injection	Seam cell specific dual color operon lin-41 3'-UTR reporter
	pDonor_double_phiC31_attB_SCMp::GFP(PEST)::H2B::lin-41_3'UTR_ΔLCS::SL2::mCherry::H2B::unc-54_3'UTR	100 ng/μl	egl-20p::mCherry (25 ng/μl)	Same as plasmid name; reporter construct was cloned into pCG150_double_phiC31_attB before injection	Seam cell specific dual color operon lin-41 3'-UTR reporter with deleted let-7 complementary sites
	pDonor_double_phiC31_attB_dpy-30p::GFP(PEST)::H2B::lin-41_3'UTR::SL2::mCherry::H2B::unc-54_3'UTR	100 ng/μl	egl-20p::mCherry (25 ng/μl)	Same as plasmid name; reporter construct was cloned into pCG150_double_phiC31_attB before injection	Global dual color operon lin-41 3'-UTR reporter
	pDonor_double_phiC31_attB_dpy-30p::GFP(PEST)::H2B::lin-41_3'UTR ΔLCS::SL2::mCherry::H2B::unc-54_3'UTR	100 ng/μl	egl-20p::mCherry (25 ng/μl)	Same as plasmid name; reporter construct was cloned into pCG150_double_phiC31_attB before injection	Global dual color operon lin-41 3'-UTR reporter with deleted let-7 complementary sites
	attB_retrofitted_Sinv47D10_short	50 ng/μl	myo-3p::mCherry (50 ng/μl)	S. invicta BAC 47D10 shortened to ~20.7 kb of fire ant sequence; shortening introduces the ampR gene (963 bp); derived from attB_retrofitted_Si47D10, so contains retrofitted attB-phiC31-r; sur-5p::GFP; attB-phiC31-f; Cbr-unc-119; kanR	BAC integration experiment; proper RMCE would integrate 33.4 kb comprising fire ant sequence and most of the vector
	attB_retrofitted_Sinv47D10	25 or 50 ng/μl	myo-3p::mCherry (8 ng/μl) or none	S. invicta BAC 47D10 (~125.4 kb of fire ant sequence) retrofitted with attB-phiC31-r; sur-5p::GFP; attB-phiC31-f; Cbr-unc-119; kanR	BAC integration experiment; proper RMCE would integrate 137.2 kb comprising fire ant sequence and most of the vector; in 110 injections, spermine (30 μM final concentration) and spermidine (70 μM) were added and the co-injection marker was omitted
	S2B. Other plasmids
	Plasmid	Description		Notes
	fosmid6-1(-)+unc+phiC31_43.1+delete-rol6_122GFP	phiC31 landing pad construct for MosSCI integration at the ttTi5605 site		Landing pad: attP-f; Cb-unc-119(+); glh-2p::phiC31; rol-6(partial); myo-2p::GFP; attP-r. Landing pad is flanked by sequence surrounding the ttTi5605 MosSCI site. Entire construct is in a fosmid to reduce chances of internal deletions associated with high copy number plasmids. Sequence in Sup. File S2
	Peft-3::cas9-SV40_NLS::tbb-2 3'UTR	Cas9 expressing plasmid		Addgene plasmid #46168; Ref Friedland et al 2013
	Nunc119-GGsgRNA1	Cbr-unc-119 sgRNA 1 expressing plasmid		Targeting sequence: ggg aag gtc gcc gag ccg gg
	Nunc119-GGsgRNA2	Cbr-unc-119 sgRNA 2 expressing plasmid		Targeting sequence: cct tgt tcg gtg ctt ggt gg. Note, 2 G's were introduced at the +1 and +2 positions of the sgRNA transcript, so the target sequence starts at +3.
	Nunc119-GGsgRNA3	Cbr-unc-119 sgRNA 3 expressing plasmid		Targeting sequence: att cct tgt tcg gtg ctt gg. Note, 2 G's were introduced at the +1 and +2 positions of the sgRNA transcript, so the target sequence starts at +3.
	T7+dpy-10+scaffold_clone_4	dpy-10 sgRNA expressing plasmid		Targeting sequence: GCT ACC ATA GGC ACC ACG AG
	T7+dpy-13+scaffold_clone_1	dpy-13 sgRNA expressing plasmid		Targeting sequence: AA AGA TGT GGT GAT TAG ATA. Note, 1 G was introduced at the +1 position of the sgRNA transcript, so the target sequence starts at +2.
	158attB-3-8	Plasmid containing sur-5p::GFP flanked by outward facing attB sites		Starting point for building the plasmid bac_retrofitted_cassette_kanR.
	bac_retrofitted_cassette_kanR	Plasmid containing the retrofitting cassette to add: attB-r sur-5p::GFP attB-f Cbr-unc-119 kanR		In this study, primers with homologous arms to the chloramphenical resistance gene (CmR) were used to PCR amplify the cassette. Then this cassette was recombineered into the CmR gene in the BAC.
	pCFJ90	myo-2p::mCherry::unc-54		Co-injection marker; Addgene plasmid #19327; Ref Frøkjær-Jensen et al 2008
	pCFJ104	myo-3p::mCherry::unc-54		Co-injection marker; Addgene plasmid #19328; Ref Frøkjær-Jensen et al 2008
	Refs:
	Friedland et al 2013 Nat Methods 10(8):741-743
	Frøkjær-Jensen et al 2008 Nat Genetics 40(11):1375-1383
